# Supplementary material for: Relationships between Clinicopathological Features and Cerebrospinal Fluid Biomarkers in Japanese Patients with Genetic Prion Diseases
Source: PubMed Central journal article supplement (PMC3610658; doi:10.1371/journal.pone.0060003), 2013-03-28

**A**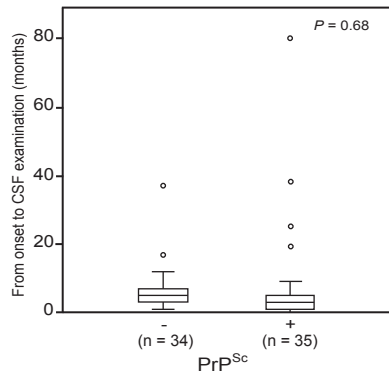**B**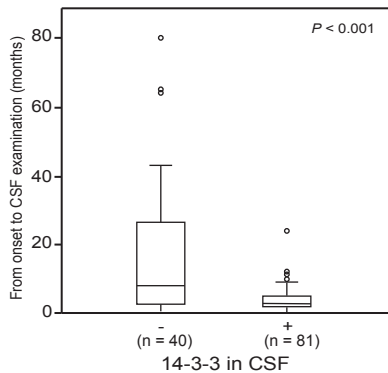**C**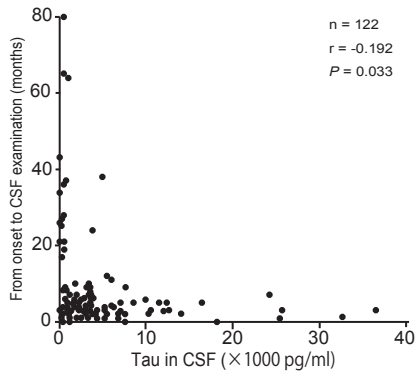

Supplement: pone.0060003.s001.pdf [file pone.0060003.s001.pdf]
