# Supplementary material for: Relationships between Clinicopathological Features and Cerebrospinal Fluid Biomarkers in Japanese Patients with Genetic Prion Diseases
Source: PubMed Central journal article supplement (PMC3610658; doi:10.1371/journal.pone.0060003), 2013-03-28
Supplement: pone.0060003.s002.pdf [file pone.0060003.s002.pdf]

HE

PrP

V180I

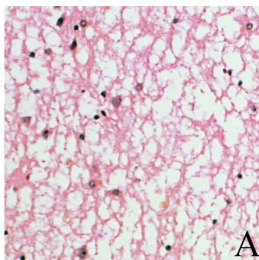

A

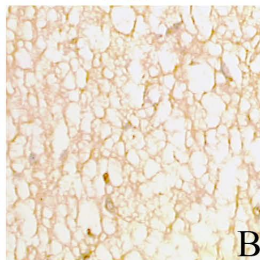

B

E200K

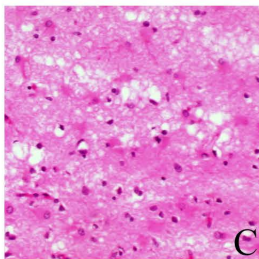

C

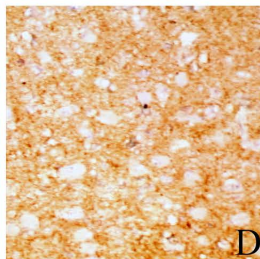

D

M232R-R

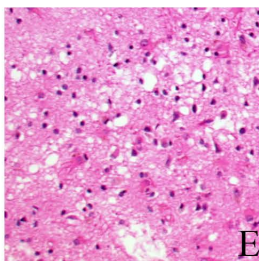

E

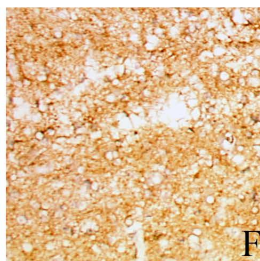

F

M232R-S

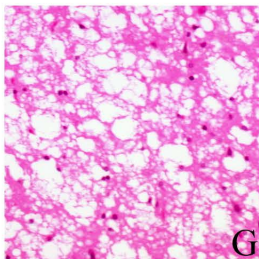

G

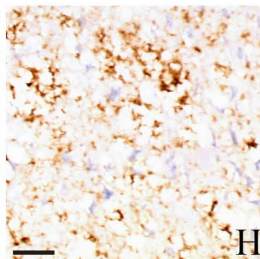

H
